# Supplementary material
Source: publisher figshare collection journal article supplement (https://acs.figshare.com/ndownloader/files/3602121)
Supplement: Supplementary file 1 [file 3602121]

**Supplemental Figure 1. AICD production is unchanged upon introduction of mutations with negative charge.** (A) Recombinant C100Flag produced A $\beta$ 37, A $\beta$ 38, A $\beta$ 40 and A $\beta$ 42 as the major constituents. In the K28E mutant, A $\beta$ 37, A $\beta$ 38, and A $\beta$ 40 were identified. 3xE C100Flag showed decreased processivity by showing increased longer A $\beta$  peptides, i.e., A $\beta$ 42. (B) No major alterations were detected in AICD fragments produced from the C100Flag and the K28E and 3xE mutants. In all cases, the major peaks were C50-99 and C49-99. (Unmarked peaks are non-specific).

**Supplemental Figure 2. Quantitation of GSM and iGSM effect on the APP mutants.** (A-F) In order to compare the major changes in each A $\beta$  isoform within each construct after drug treatment, The A $\beta$  profiles from Figure 2B-2G were quantified as described (39, 54). Each stack in the graph represents the ratio of each peak height to the sum of the all the peaks. (A) GSM-1 dramatically lowered A $\beta$ 42 and raised A $\beta$ 38 without any major changes in other A $\beta$  isoforms. Cmpd2 lowered both A $\beta$ 42 and A $\beta$ 40, and raised both A $\beta$ 38 and A $\beta$ 37. Fenofibrate raised A $\beta$ 42 and lowered A $\beta$ 38. (B) The isoforms identified in the K624A mutant did not demonstrate any major changes after GSM or iGSM treatment. (C) The K624R showed a response similar to the WT. (D) The N623K showed slightly diminished effects after treatment with either GSM, whereas fenofibrate was still active. For example, the effect for raising A $\beta$ 38 was reduced by ca. 9% for GSM-1 and 11% for Cmpd2, respectively relative to the wt. (E) The G625K and (F) the 3xK mutants illustrated a more pronounced decrease in responsiveness to GSM treatment. Fenofibrate treatment raised not only A $\beta$ 42 but also A $\beta$ 43 in both mutants. For example, the capacity to raise A $\beta$ 38 reduced by ca. 20% for GSM-1 and 34% for Cmpd2 for G625K, and reduced by 26% and 29% for GSM-1 and Cmpd2 for 3K, respectively. (G) The K624E demonstrated reduced activity for both GSMs and iGSM. These analyses were based on 2-3 experiments with 2 replicates in each experiment. (Maximal S.E.M= $\pm$ 5.5)

**A**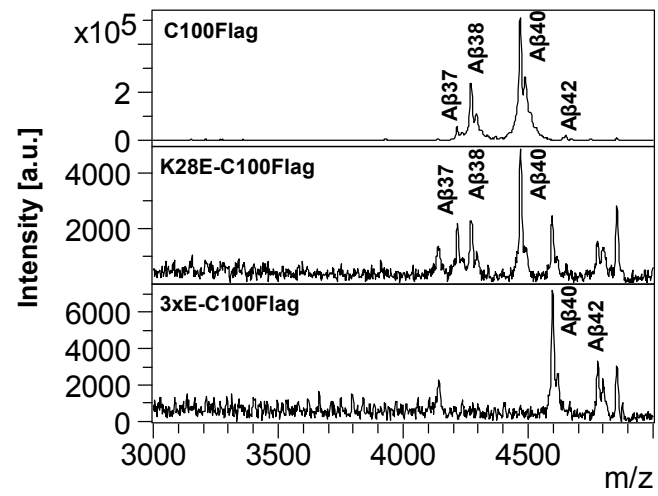**B**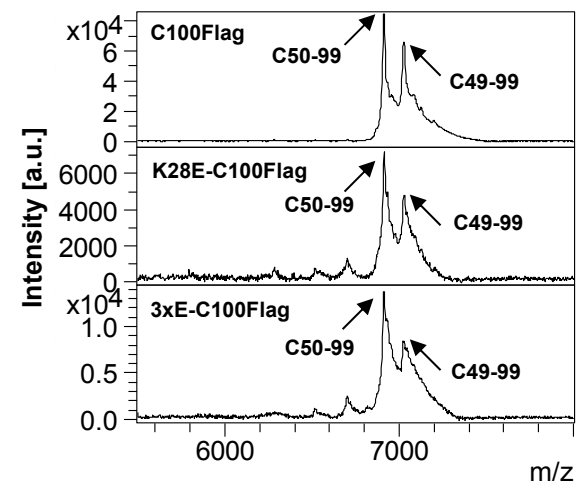**Supplemental Figure1**

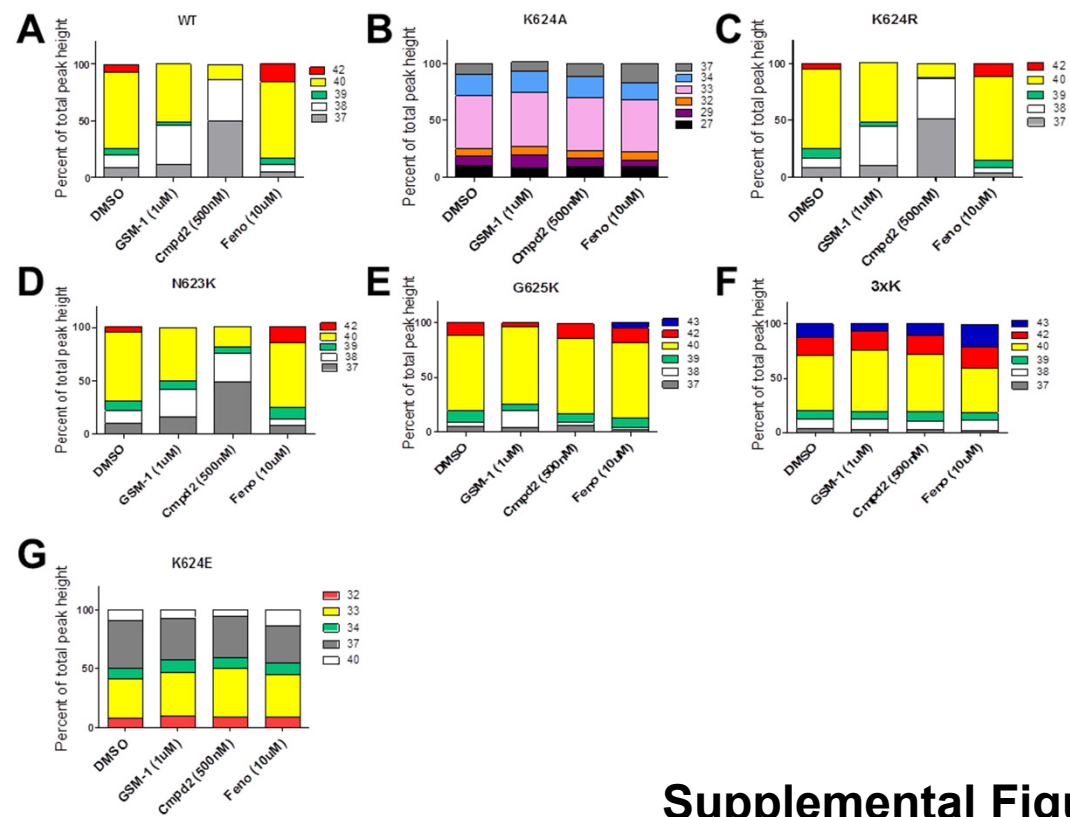

Supplemental Figure2

Supplemental table1. Molecular weight of A $\beta$  and AICD detected

| Construct         | A $\beta$    | MW Calculated (Da) | MW Observed (Da) |
|-------------------|--------------|--------------------|------------------|
| WT                | A $\beta$ 37 | 4074.5             | 4074.625         |
|                   | A $\beta$ 38 | 4131.5             | 4132.999         |
|                   | A $\beta$ 39 | 4230.7             | 4226.845         |
|                   | A $\beta$ 40 | 4329.8             | 4329.133         |
|                   | A $\beta$ 42 | 4514.0             | 4513.029         |
| K624A             | A $\beta$ 27 | 3134.3             | 3131.529         |
|                   | A $\beta$ 29 | 3262.4             | 3260.147         |
|                   | A $\beta$ 32 | 3559.8             | 3554.966         |
|                   | A $\beta$ 33 | 3616.8             | 3613.253         |
|                   | A $\beta$ 34 | 3730.0             | 3727.300         |
| K624R             | A $\beta$ 37 | 4017.4             | 4014.180         |
|                   | A $\beta$ 37 | 4102.5             | 4101.014         |
|                   | A $\beta$ 38 | 4159.5             | 4159.255         |
|                   | A $\beta$ 39 | 4258.7             | 4261.102         |
|                   | A $\beta$ 40 | 4357.8             | 4363.323         |
| N623K             | A $\beta$ 42 | 4542.0             | 4554.425         |
|                   | A $\beta$ 37 | 4088.6             | 4082.701         |
|                   | A $\beta$ 38 | 4145.6             | 4140.781         |
|                   | A $\beta$ 39 | 4244.8             | 4239.172         |
|                   | A $\beta$ 40 | 4343.9             | 4340.822         |
| G625K             | A $\beta$ 42 | 4528.1             | 4527.033         |
|                   | A $\beta$ 37 | 4145.5             | 4157.145         |
|                   | A $\beta$ 38 | 4202.5             | 4210.454         |
|                   | A $\beta$ 39 | 4301.7             | 4314.058         |
|                   | A $\beta$ 40 | 4400.8             | 4415.871         |
| G625K/A626K (3xK) | A $\beta$ 42 | 4585.0             | 4608.463         |
|                   | A $\beta$ 37 | 4202.5             | 4193.461         |
|                   | A $\beta$ 38 | 4259.5             | 4235.670         |
|                   | A $\beta$ 39 | 4358.7             | 4356.073         |
|                   | A $\beta$ 40 | 4457.8             | 4458.888         |
| K624E             | A $\beta$ 42 | 4642.0             | 4649.134         |
|                   | A $\beta$ 43 | 4743.1             | 4754.816         |
|                   | A $\beta$ 32 | 3617.9             | 3613.898         |
|                   | A $\beta$ 33 | 3675.0             | 3672.439         |
|                   | A $\beta$ 34 | 3788.1             | 3785.239         |
| 3xE-C100Flag      | A $\beta$ 37 | 4075.5             | 4071.524         |
|                   | A $\beta$ 40 | 4330.8             | 4327.860         |
|                   | A $\beta$ 40 | 4598.0             | 4592.0           |
|                   | A $\beta$ 42 | 4782.1             | 4776.3           |
|                   | A $\beta$ 40 | 4782.1             | 4776.3           |
| C100Flag          | C50-99       | 6905.66            | 6903.964         |
|                   | C49-99       | 7018.82            | 7018.86          |
| 3xK-C100Flag      | C50-99       | 6905.66            | 6905.473         |
|                   | C49-99       | 7018.82            | 7017.932         |
| K28E-C100Flag     | C50-99       | 6905.66            | 6913.932         |
|                   | C49-99       | 7018.82            | 7028.528         |
| 3xE-C100Flag      | C50-99       | 6905.66            | 6911.40          |
|                   | C49-99       | 7018.82            | 7028.379         |

Supplemental table2. EC50 values for A $\beta$ 42 lowering effect of GSMs and iGSM

| Mutants  | Baseline A $\beta$ 42 (pM) | GSM-1 (nM)       | Cmpd 2 (nM)     |
|----------|----------------------------|------------------|-----------------|
| APP695wt | 174.5 $\pm$ 7.5            | 183.4 $\pm$ 1.5  | 43.6 $\pm$ 1.2  |
| K624A    | Under detection limit      | NC               | NC              |
| K624R    | 68.1 $\pm$ 4.1             | 232.5 $\pm$ 1.5  | 83.5 $\pm$ 1.2  |
| N623K    | 52.8 $\pm$ 3.6             | 896.7 $\pm$ 1.5  | 149.1 $\pm$ 1.3 |
| G625K    | 120.2 $\pm$ 3.5            | 1055.0 $\pm$ 1.4 | NC              |
| 3xK      | 215.7 $\pm$ 6.4            | NC               | NC              |
| K624E    | Under detection limit      | NC               | NC              |

Supplemental table3. EC50 values for A $\beta$ 40 altering effects of GSMs and iGSM

| Mutants  | Baseline A $\beta$ 40 (pM) | GSM-1 (nM) | Cmpd 2 (nM)     |
|----------|----------------------------|------------|-----------------|
| APP695wt | 997.8 $\pm$ 66.0           | NC         | 126.2 $\pm$ 1.2 |
| K624A    | Under detection limit      | NC         | NC              |
| K624R    | 476.3 $\pm$ 23.4           | NC         | 437.5 $\pm$ 1.2 |
| N623K    | 682.0 $\pm$ 51.0           | NC         | 455.2 $\pm$ 1.3 |
| G625K    | 312.7 $\pm$ 11.7           | NC         | NC              |
| 3xK      | 264.0 $\pm$ 13.2           | NC         | NC              |
| K624E    | Under detection limit      | NC         | NC              |
